# Supplementary material for: Identification of industrial detergent enzymes by SDS-PAGE and MALDI-TOF mass spectrometry
Source: Royal Society of Chemistry journal article supplement (doi:10.1039/d1nj05227f), 2022-01-01
Supplement: d1nj05227f1.pdf [file d1nj05227f1.pdf]

## Identification of industrial detergent enzymes by SDS-PAGE and MALDI-TOF mass spectrometry

Ghazaleh Abedi,<sup>a</sup> Zahra Talebpour,<sup>\*a,b</sup> Atousa Aliahmadi,<sup>c</sup> and Ilnaz Soleimani Mashhadi<sup>d</sup>

<sup>a</sup>Department of Chemistry, Faculty of Physics and Chemistry, Alzahra University, Vanak, Tehran, Iran.

<sup>b</sup>Analytical and Bioanalytical Research Centre, Alzahra University, Vanak, Tehran, Iran.

<sup>c</sup>Department of Biology, Medicinal Plants and Drugs Research Institute, Shahid Beheshti University, Tehran, Iran.

<sup>d</sup>Department of Phytochemistry, Medicinal Plants and Drugs Research Institute, Shahid Beheshti University, Tehran, Iran.

E-mail: [ztalebpour@alzahra.ac.ir](mailto:ztalebpour@alzahra.ac.ir)

Electronic Supplementary Material (ESI) for New Journal of Chemistry

**Table S1.** Composition of the detergent base used in this work (wt%).

| Component                         | wt%   |
|-----------------------------------|-------|
| Surfactant                        | 18.93 |
| Builder                           | 37.87 |
| Filler                            | 34.08 |
| Anti-redeposition agent           | 2.96  |
| Anti-foaming agent                | 0.36  |
| Fluorescent whitening agent (FWA) | 0.47  |
| Water                             | 5.33  |

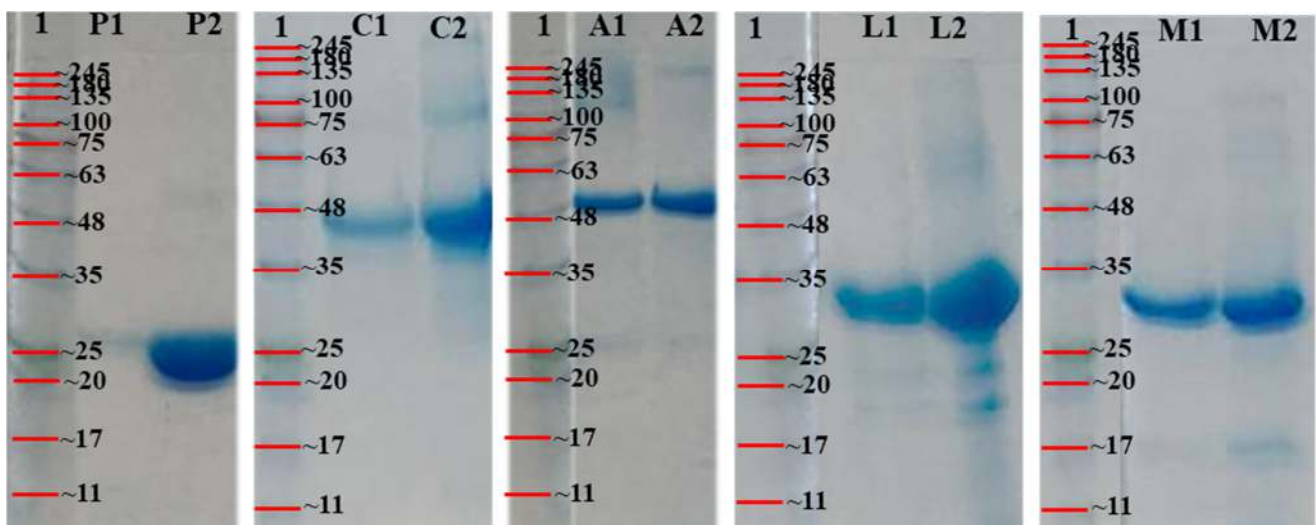

**Figure S1** SDS-PAGE results for comparison of protein bands appearing without and with enzyme precipitation in standard enzymes; in all gels first lane: molecular weight marker, second lane: non-precipitated enzyme, and third lane: precipitated enzyme; P: Protease, C: Cellulase, A:  $\alpha$ -Amylase, L: Lipase, M: Mannanase.

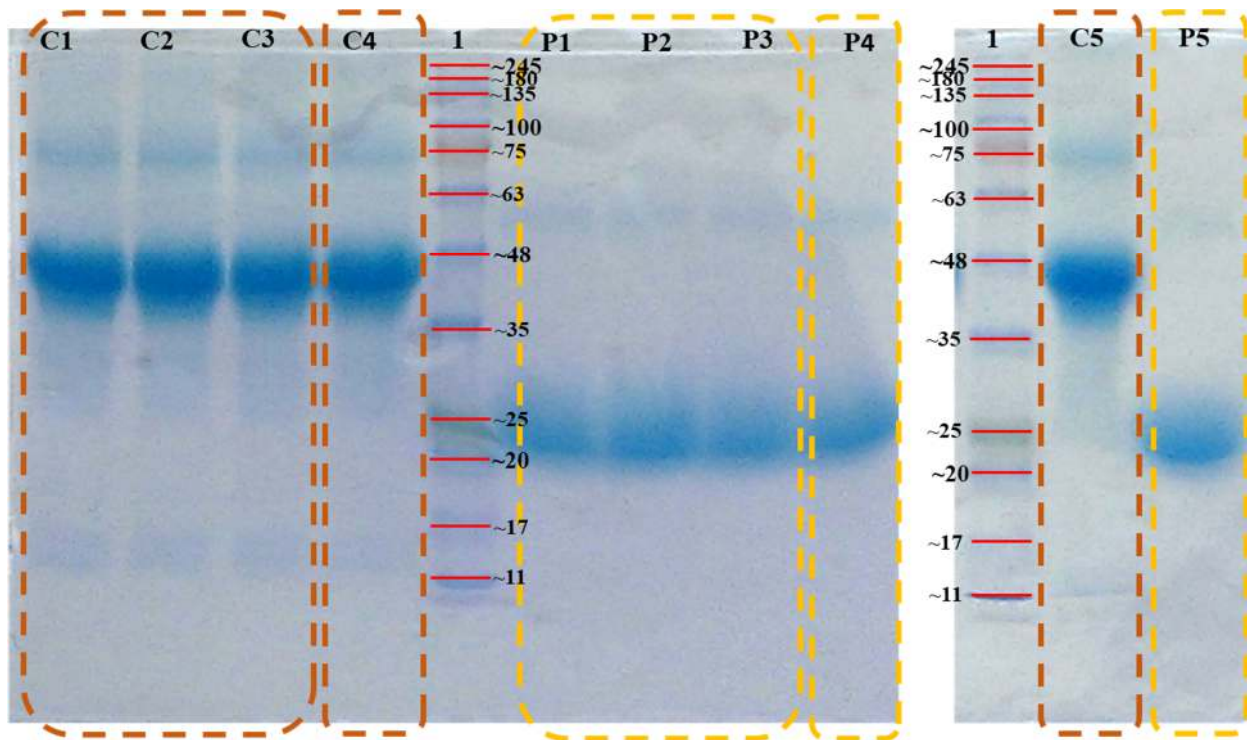

**Figure S2** Repeatability of enzyme precipitation process; lane C1-C3: standard enzyme of Cellulase, lane P1-P3: standard enzyme of Protease. Repeatability of sample preparation process; lane C4: standard enzyme of Cellulase, lane P4: standard enzyme of Protease. Repeatability between gels; lane C5: standard enzyme of Cellulase, lane P5: standard enzyme of Protease, lane 1 in both of them: molecular weight marker.

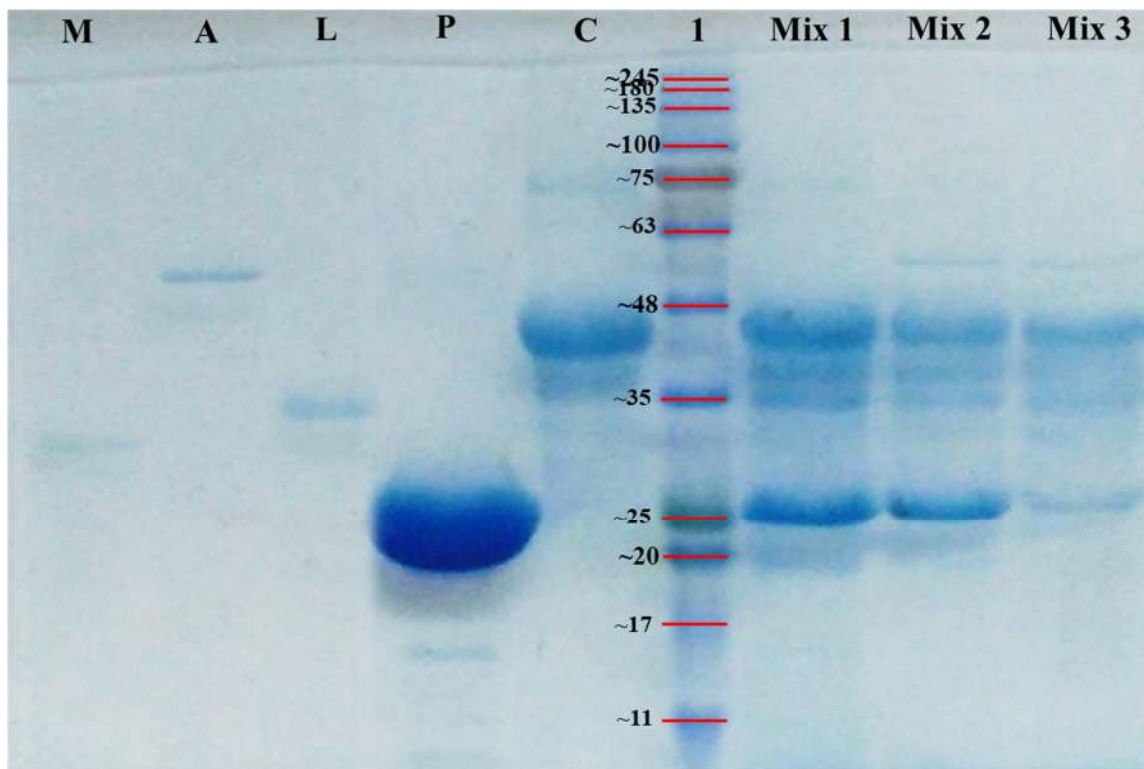

**Figure S3** Efficiency evaluation of the proposed method by separating the manually mixed standard enzymes (coomassie brilliant blue staining), lane M: Mannanase, lane A:  $\alpha$ -Amylase, lane L: Lipase, lane P: Everlase, lane C: Cellulase, lane 1: molecular weight marker, lane Mix 1: a mixture of Protease, Lipase, and Cellulase, lane Mix 2: a mixture of Protease, Lipase,  $\alpha$ -Amylase, and Cellulase, and lane Mix 3: a mixture of Protease, Lipase,  $\alpha$ -Amylase, Mannanase, and Cellulase.

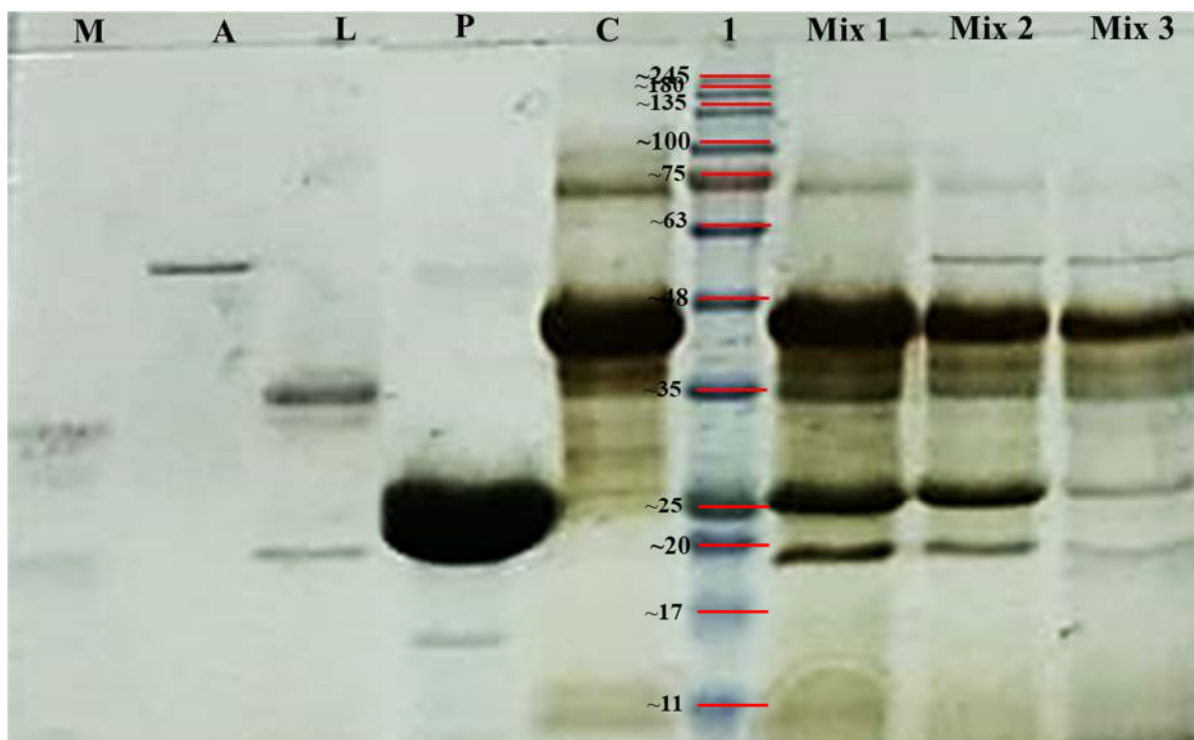

**Figure S4** Efficiency evaluation of the proposed method by separating the manually mixed standard enzymes (silver nitrate staining), lane M: Mannanase, lane A:  $\alpha$ -Amylase, lane L: Lipase, lane P: Everlase, lane C: Cellulase, lane 1: molecular weight marker, lane Mix 1: a mixture of Protease, Lipase, and Cellulase, lane Mix 2: a mixture of Protease, Lipase,  $\alpha$ -Amylase, and Cellulase, and lane Mix 3: a mixture of Protease, Lipase,  $\alpha$ -Amylase, Mannanase, and Cellulase.

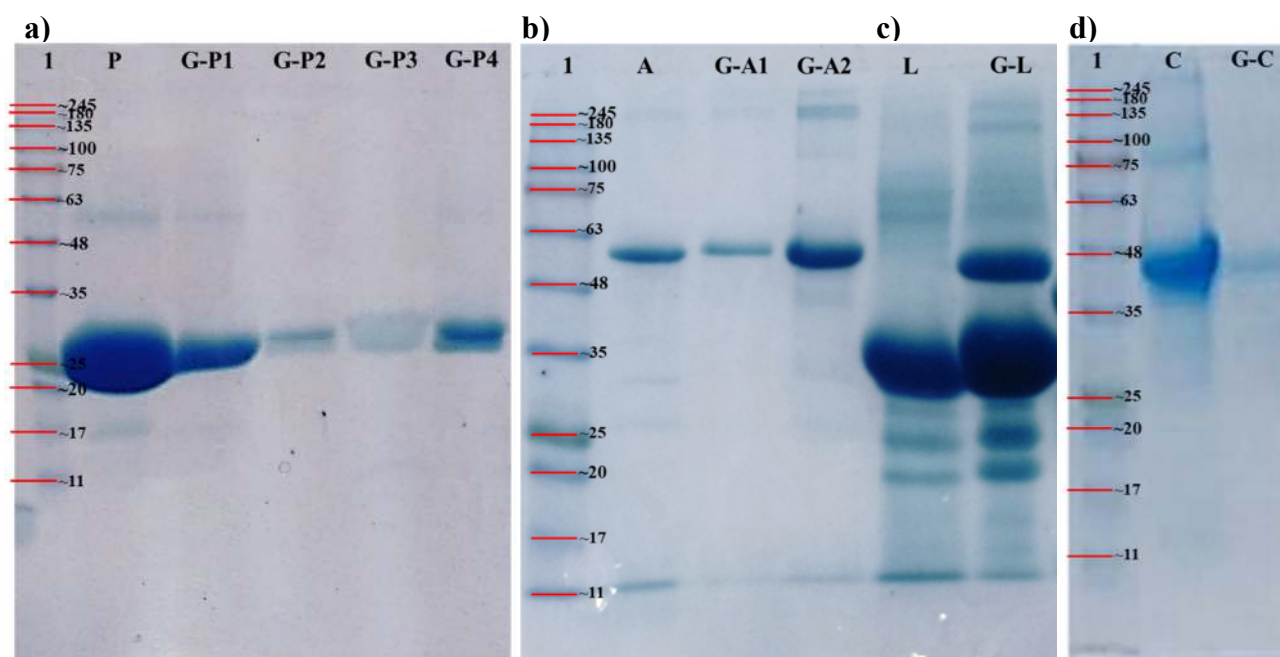

**Figure S5** SDS-PAGE analysis of a) four different types of granular proteases, lane P: standard enzyme of Protease, lane G-P1: Granular Protease 1, lane G-P2: Granular Protease 2, lane G-P3: Granular Protease 3, lane G-P4: Granular Protease 4; b) two different types of granular  $\alpha$ -Amylases, lane A: standard enzyme of  $\alpha$ -Amylase, lane G-A1: Granular  $\alpha$ -Amylase 1, lane G-A2: Granular  $\alpha$ -Amylase 2; c) granular lipase, lane L: standard enzyme of Lipase, lane G-L: Granular Lipase; and d) granular cellulase, lane C: standard enzyme of Cellulase, lane G-C: Granular Cellulase, lane 1 in all gels: molecular weight marker.

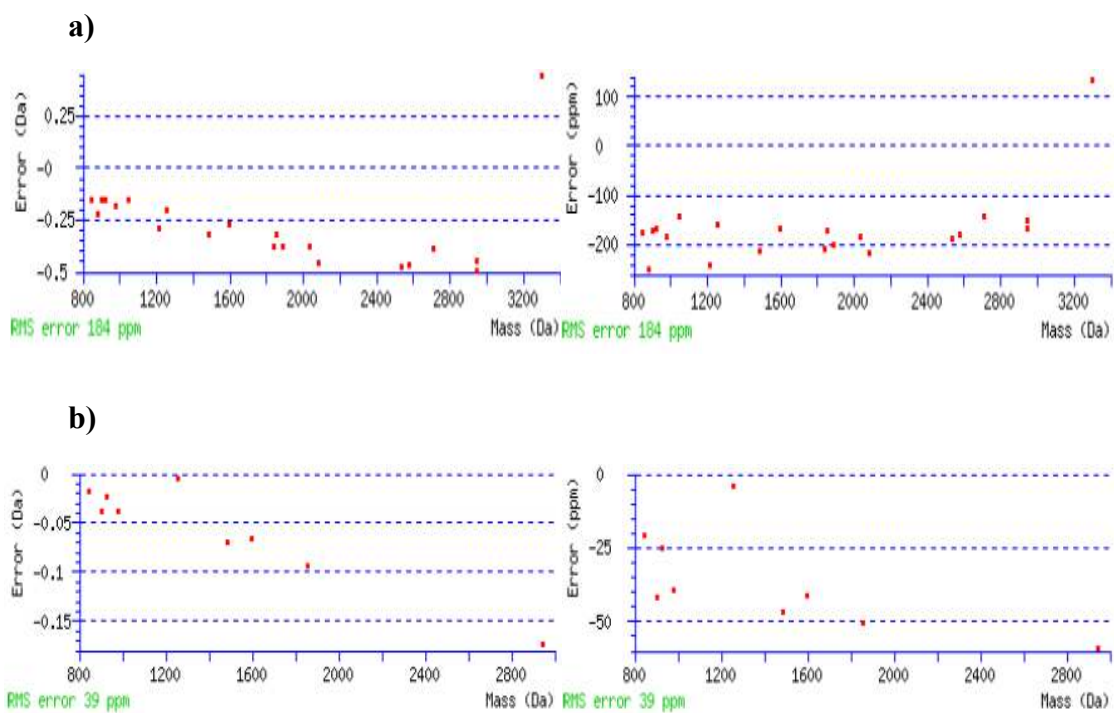

**Figure S6** Residual plots in terms of Da. and ppm for standard enzymes of a)  $\alpha$ -Amylase and b) granular enzyme of  $\alpha$ -Amylase.



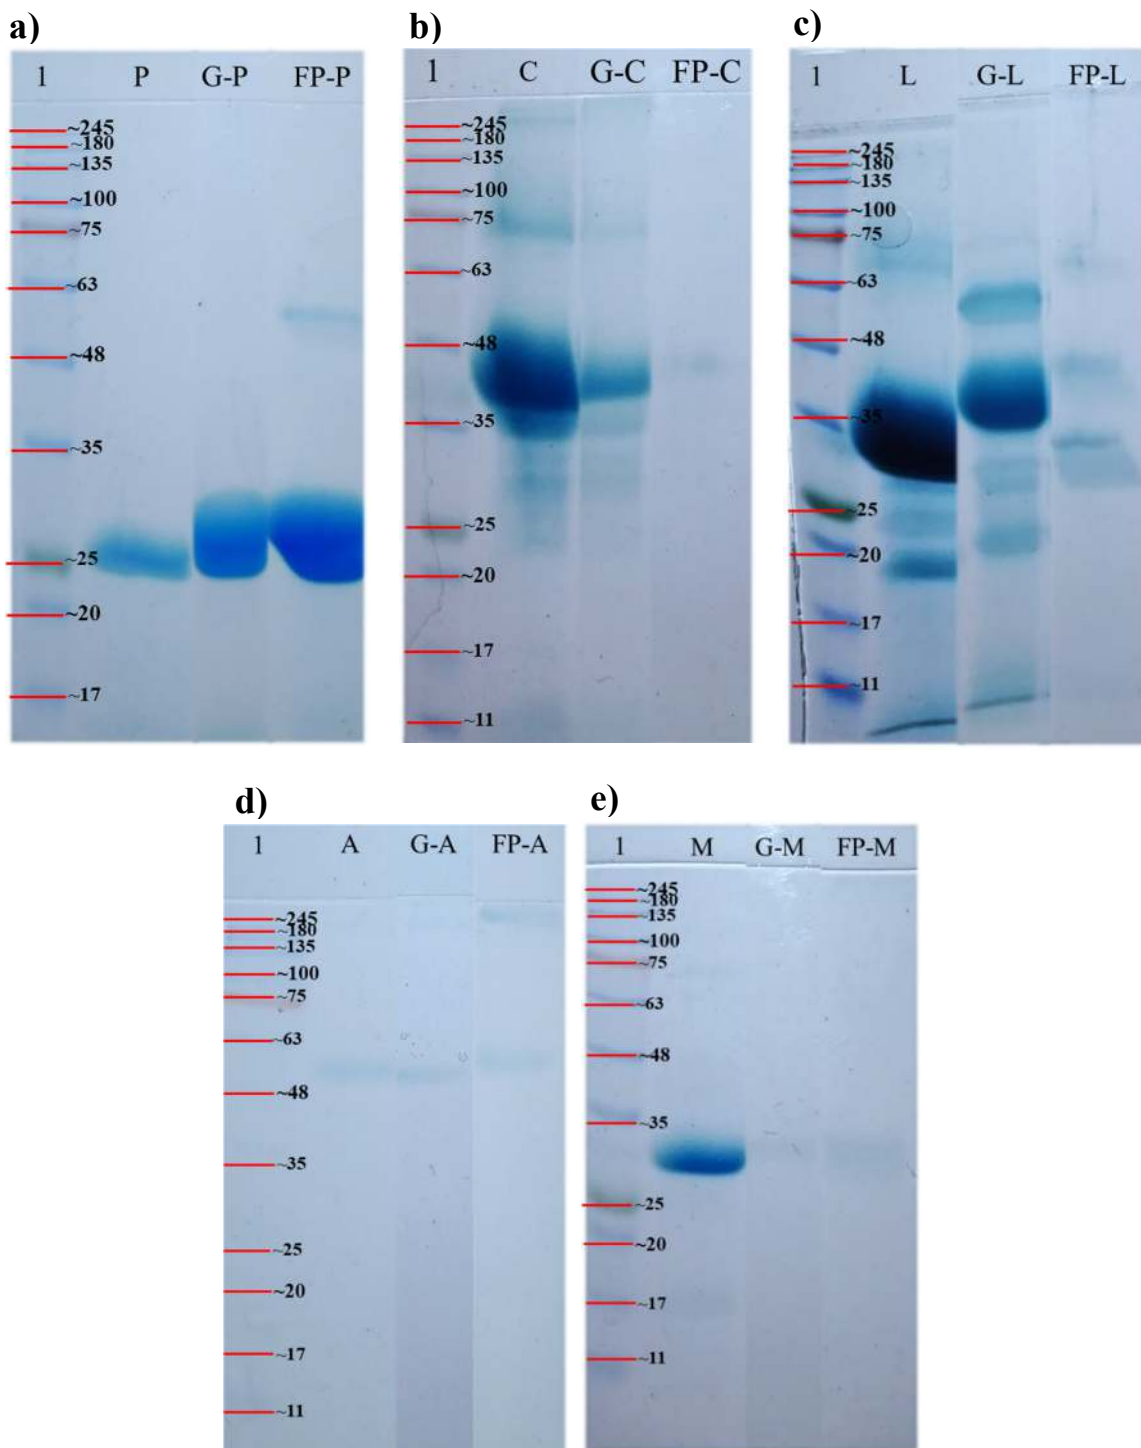

**Figure S7** SDS-PAGE analysis of fortified powder detergent by a) Protease, b) Cellulase, c) Lipase, d)  $\alpha$ -Amylase, and e) Mannanase; in all gels the first lane: molecular weight marker, second lane: standard enzyme, third lane: granular enzyme, and fourth lane: fortified powder detergent base.

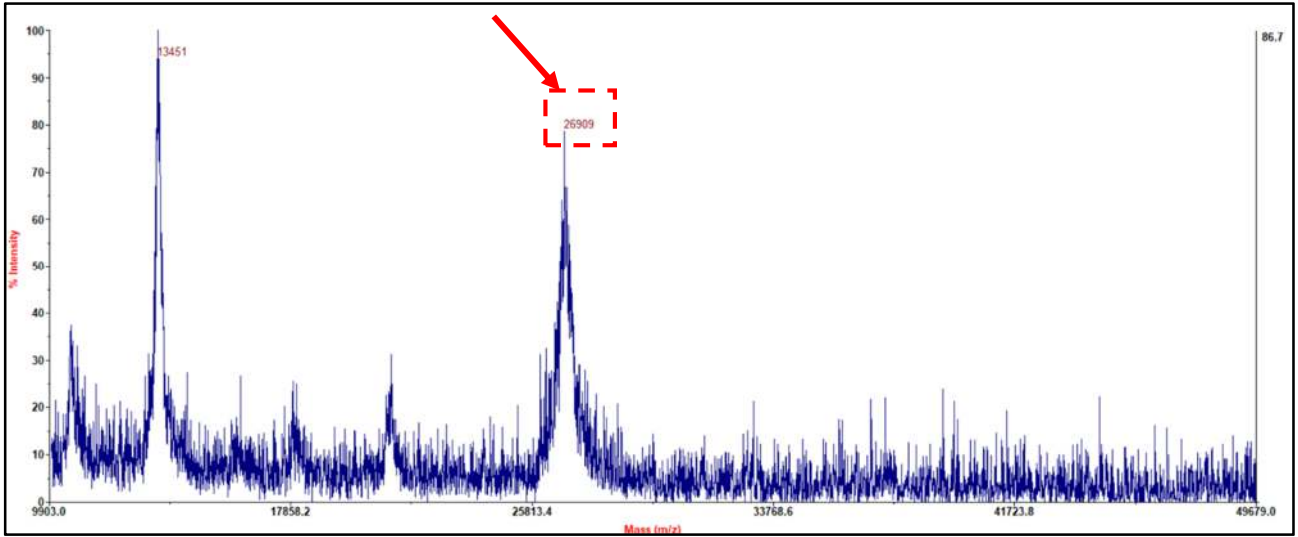

**Figure S8** The MALDI-TOF mass spectrum of the commercial powder detergent containing a protease.
